# Supplementary material for: Deklinabidearen jabekuntza-garapena haur euskaldun elebakar batengan
Source: MDPI journal article supplement (doi:10.3390/polym14091748), 1994-01-01
Supplement: s1 [file s1]

# Supplementary Information

## Polyethylenimine-Functionalized Nanofiber Nonwovens Electrospun from Cotton Cellulose for Wound Dressing with High Drug Loading and Sustained Release Properties

Qunhao Wang <sup>1</sup>, Mei Li <sup>1</sup>, Zhuo Zheng <sup>1</sup>, Yan Niu <sup>1</sup>, Xiaolin Xue <sup>1</sup>, Chenghong Ao <sup>1,2</sup>, Wei Zhang <sup>1,3,\*</sup>, Canhui Lu <sup>1,3,\*</sup>

1 State Key Laboratory of Polymer Materials Engineering, Polymer Research Institute at Sichuan University, Chengdu 610065, China.; wangqunhao@stu.scu.edu.cn (Q.W.); limei991010@163.com (M.L.); zhuo\_zheng@scu.edu.cn (Z.Z.); 17839918692@163.com (Y.N.); xuexiaolin@stu.scu.edu.cn (X.X.); chenghongao@163.com (C.A.)

2 Faculty of Environmental Science & Engineering, Kunming University of Science & Technology, Kunming 650500, P. R. China

3 Advanced Polymer Materials Research Center of Sichuan University, Shishi 362700, China;

\* Correspondence: weizhang@scu.edu.cn (W.Z.); canhuilu@scu.edu.cn (C.L.); Tel.: +86-28-85460607 (W.Z.); Fax: +86-28-85402465 (W.Z.)

## 1. Figure

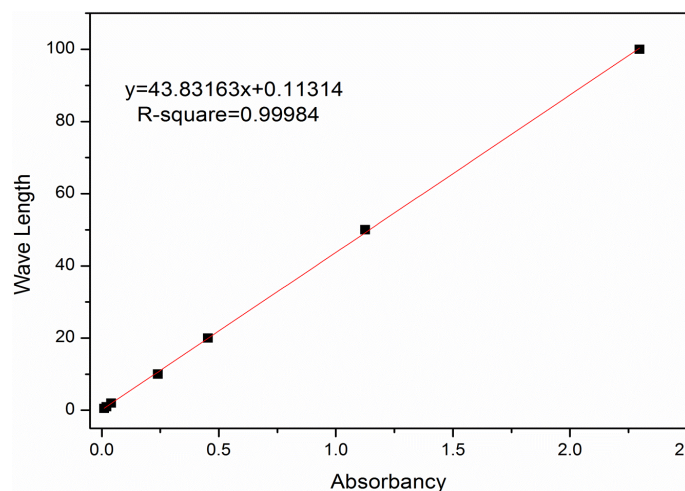

**Figure S1.** The standard absorbance-concentration curve of NaSA solutions.

## 2. Table

**Table S1.** Comparison of sustained drug release times of cellulose-PEI and other cellulose-based drug carriers.

|                                           | Drug                 | Drug release time | Ref       |
|-------------------------------------------|----------------------|-------------------|-----------|
| Cellulose nanocrystal/chitosan hydrogel   | theophylline         | 6 h               | [1]       |
| Trimethylsilyl cellulose film             | diclofenac           | 4 h               | [2]       |
| Cellulose nanofibril aerogel              | sodium salicylate    | 2 h               | [3]       |
| Bacterial cellulose/acrylic acid hydrogel | bovine serum albumin | 8 h               | [4]       |
| Bacterial cellulose                       | Diclofenac sodium    | 10 h              | [5]       |
| Cellulose-PEI membrane                    | sodium salicylate    | 12 h              | This work |

## References

1. Xu, Q.; Ji, Y.; Sun, Q.; Fu, Y.; Xu, Y.; Jin, L. Fabrication of Cellulose Nanocrystal/Chitosan Hydrogel for Controlled Drug Release. *Nanomaterials* 2019, 9, 253.
2. Maver, T.; Maver, U.; Mostegel, F.; Griesser, T.; Spirk, S.; Smrke, D.M.; Stana-

Kleinschek, K. Cellulose Based Thin Films as a Platform for Drug Release Studies to Mimick Wound Dressing Materials. *Cellulose* 2015, 22, 749–761.

3. Mohd Amin, M.C.I.; Ahmad, N.; Halib, N.; Ahmad, I. Synthesis and Characterization of Thermo- and PH-Responsive Bacterial Cellulose/Acrylic Acid Hydrogels for Drug Delivery. *Carbohydrate Polymers* 2012, 88, 465–473.

4. Zhao, J.; Lu, C.; He, X.; Zhang, X.; Zhang, W.; Zhang, X. Polyethylenimine-Grafted Cellulose Nanofibril Aerogels as Versatile Vehicles for Drug Delivery. *ACS Appl. Mater. Interfaces* 2015, 7, 2607–2615.

5. Adepu, S.; Khandelwal, M. Ex-Situ Modification of Bacterial Cellulose for Immediate and Sustained Drug Release with Insights into Release Mechanism. *Carbohydrate Polymers* 2020, 249, 116816.
